# Supplementary material for: Annual Evaluation of 17 Oestrogenic Endocrine Disruptors and Hazard Indexes in the Douro River Estuary—The Atlantic Discharge of the Highest-Flow River of Southwestern Europe
Source: MDPI journal article supplement (doi:10.3390/w14132046), 2022-06-26
Supplement: s1 [file s1]

## Supplementary Materials

**Table S1:** Quantification and diagnostic ions used in GC-MS analyses. The relative abundance of ions ( $m/z$ ) is indicated between brackets (detailed information in Rocha et al. 2013).

| Compound | MDL<br>(ng/L) | $t_R$ (min) | Molecular<br>mass | Quantification<br>ions ( $m/z$ ) | Diagnostic ions<br>( $m/z$ )          | Segment<br>[time (min)] |
|----------|---------------|-------------|-------------------|----------------------------------|---------------------------------------|-------------------------|
| 4-t-OP   | 1.46          | 10.8        | 206.3             | 207 (100)                        | -                                     | 8.5-17.2                |
| 4-NP     | 3.50          | 11.5-12.5   | 220.4             | 207 (100)                        | 179 (84.9), 193 (31.9),<br>221 (31.9) | 8.5-17.2                |
| 4-OP     | 5.47          | 12.9        | 206.3             | 179 (100)                        | 180 (17.7)                            | 8.5-17.2                |
| 4-n-NP   | 0.60          | 14.2        | 220.4             | 179 (100)                        | 292 (35.9)                            | 8.5-17.2                |
| OP1EO    | 5.29          | 14.8        | 250.4             | 251 (100)                        | 207 (97.2), 135 (68.9)                | 8.5-17.2                |
| NP1EO    | 1.84          | 15.8-16.6   | 264.4             | 251 (100)                        | 265 (64.4), 207 (59.5),<br>135 (45.5) | 8.5-17.2                |
| BPA-d16  | -             | 17.9        | 244.3             | 368 (100)                        | 369 (34.7), 386 (9.1)                 | 17.2-22.5               |
| BPA      | 0.73          | 18.1        | 228.3             | 357 (100)                        | 358 (30.8)                            | 17.2-22.5               |
| OP2EO    | 0.94          | 18.6        | 294.4             | 295 (100)                        | 207 (76.5), 115 (55.2)                | 17.2-22.5               |
| NP2EO    | 2.07          | 19.6-19.9   | 308.5             | 295 (100)                        | 207 (74.9)                            | 17.2-22.5               |
| E1       | 0.97          | 24.7        | 270.4             | 342 (100)                        | 357 (55.1)                            | 22.5-25.3               |
| E2-d2    | -             | 24.9        | 272.4             | 287 (100)                        | 418 (75.2), 328 (72.8)                | 22.5-25.3               |
| E2       | 0.86          | 25.0        | 274.4             | 285 (100)                        | 416 (85.2), 326 (48.4)                | 22.5-25.3               |
| EE2      | 1.34          | 27.3        | 296.4             | 425 (100)                        | 285 (48.0), 426 (34.7)                | 25.3-29.0               |
| FORM     | 2.61          | 28.6        | 268.3             | 340 (100)                        | 339 (76.0), 355 (22.6)                | 25.3-29.0               |
| BIO-A    | 1.38          | 30.5        | 284.3             | 356 (100)                        | 341 (34.3)                            | 29.0-35.0               |
| DAID     | 1.25          | 30.5        | 254.2             | 398 (100)                        | 383 (76.0), 355 (22.6)                | 29.0-35.0               |
| GEN      | 1.14          | 30.8        | 270.2             | 471 (100)                        | 473 (19.9)                            | 29.0-35.0               |
| SITO     | 2.01          | 43.4        | 414.7             | 396 (100)                        | 486 (53.4), 255 (49.4)                | 35.0-45.0               |

**Table S2:** Data referring to PCA of EDCs in Douro River estuary.

| Estrogens   | PC 1  | PC 2  | PC 3  | Phytoestrogens & SITO | PC 1        | PC 2    | PC 3  | PC 4  | PC 5  |
|-------------|-------|-------|-------|-----------------------|-------------|---------|-------|-------|-------|
| E1          | 0.68  | -0.22 | 0.70  | FORM                  | 0.53        | -0.08   | -0.21 | -0.23 | 0.78  |
| E2          | 0.26  | 0.96  | 0.04  | BIO-A                 | 0.53        | -0.06   | -0.13 | -0.60 | -0.58 |
| EE2         | 0.69  | -0.16 | -0.71 | DAID                  | 0.51        | 0.09    | -0.37 | 0.74  | -0.22 |
|             |       |       |       | GEN                   | 0.12        | 0.96    | 0.22  | -0.08 | 0.05  |
|             |       |       |       | SITO                  | 0.39        | -0.23   | 0.87  | 0.19  | 0.00  |
| OPs & OPEOs | PC 1  | PC 2  | PC 3  | PC 4                  | NPs & NPEOs | PC 1    | PC 2  | PC 3  | PC 4  |
| 4-t-OP      | -0.27 | 0.92  | 0.18  | 0.20                  | 4-NP        | 0.54476 | -0.39 | -0.26 | -0.69 |
| 4-n-OP      | 0.59  | 0.35  | -0.06 | -0.72                 | 4-n-NP      | 0.48237 | -0.55 | 0.42  | 0.53  |
| OP1EO       | 0.51  | -0.07 | 0.80  | 0.31                  | NP1EO       | 0.43909 | 0.62  | 0.61  | -0.24 |
| OP2EO       | 0.56  | 0.15  | -0.57 | 0.58                  | NP2EO       | 0.52702 | 0.40  | -0.62 | 0.43  |
